# Supplementary material for: A new specimen of Palvennia hoybergeti: implications for cranial and pectoral girdle anatomy in ophthalmosaurid ichthyosaurs
Source: PeerJ. 2018 Oct 12;6:e5776. doi: 10.7717/peerj.5776 (PMC6187996; doi:10.7717/peerj.5776)
Supplement: Supplemental Information 1 [file peerj-06-5776-s001.xlsx]

## Sheet: Skull forefin pectoral girdle
PMO 222.669	Measurements in mm
Pterygoid, left
Total anteroposterior length	580
Selected measurements from the right humerus
Maximum proximodistal length	167
Minimum anteroposterior width, midshaft	78
Maximum anteroposterior width, proximal end	109
Maximum dorsoventral height, proximal end	61
Maximum anteroposterior width, distal end	120
Length of radial facet anteroposteriorly	50
Length of ulnar facet anteroposteriorly	41
Length of preax. element facet anteroposteriorly	29
Maximum dorsoventral width of radial facet	41
Maximum dorsoventral width of ulnar facet	33
Maximum dorsoventral width of facet for preax. element	26
Zeugopodium elements
Radius proximal dorsoventral height maximum	42
Radius distal dorsoventral height minimum	25
Radius maximum proximodistal length	46
Radius maximum anteroposterior width	59
Ulna proximal dorsoventral height maximum	38
Ulna distal dorsoventral height minimum	19
Ulna maximum proximodistal length	53
Ulna maximum anteroposterior width	61
Intermedium proximal dorsoventral height maximum	27
Intermedium distal dorsoventral height minimum	21
Intermedium maximum proximodistal length	37
Intermedium maximum anteroposterior width	49
Preaxial acc. element proximal dorsoventral height maximum	27
Preaxial acc. element distal dorsoventral height minimum	14
Preaxial acc. element maximum proximodistal length	45
Preaxial acc. element maximum anteroposterior width	41
Ulnare proximal dorsoventral height maximum	24
Ulnare distal dorsoventral height minimum	16
Ulnare maximum proximodistal length	42
Ulnare maximum anteroposterior width	34
Radiale proximal dorsoventral height maximum	29
Radiale distal dorsoventral height minimum	24
Radiale maximum proximodistal length	32
Radiale maximum anteroposterior width	46
Distal carpal 4 proximal dorsoventral height maximum	20
Distal carpal 4 distal dorsoventral height minimum	16
Distal carpal 4 maximum proximodistal length	37
Distal carpal 4 maximum anteroposterior width	36
Distal carpal 3 proximal dorsoventral height maximum	21
Distal carpal 3 distal dorsoventral height minimum	19
Distal carpal 3 maximum proximodistal length	30
Distal carpal 3 maximum anteroposterior width	41
Distal carpal 2 proximal dorsoventral height maximum	22
Distal carpal 2 distal dorsoventral height minimum	17
Distal carpal 2 maximum proximodistal length	31
Distal carpal 2 maximum anteroposterior width	31
Selected measurements from the left humerus
Maximum proximodistal length	157
Minimum anteroposterior width, midshaft	75
Maximum anteroposterior width, proximal end	123
Maximum dorsoventral height, proximal end	58
Maximum anteroposterior width, distal end	122
Length of radial facet anteroposteriorly	50
Length of ulnar facet anteroposteriorly	53
Length of preax. element facet anteroposteriorly	34
Maximum dorsoventral width of radial facet	NA
Maximum dorsoventral width of ulnar facet	35
Maximum dorsoventral width of facet for preax. element	25
Zeugopodium elements
Radius proximal dorsoventral height maximum	NA
Radius distal dorsoventral height minimum	27
Radius maximum proximodistal length	38
Radius maximum anteroposterior width	58
Ulna proximal dorsoventral height maximum	41
Ulna distal dorsoventral height minimum	26
Ulna maximum proximodistal length	51
Ulna maximum anteroposterior width	60
Intermedium proximal dorsoventral height maximum	NA
Intermedium distal dorsoventral height minimum	28
Intermedium maximum proximodistal length	40
Intermedium maximum anteroposterior width	54
Preaxial acc. element proximal dorsoventral height maximum	32
Preaxial acc. element distal dorsoventral height minimum	18
Preaxial acc. element maximum proximodistal length	49
Preaxial acc. element maximum anteroposterior width	46
Ulnare proximal dorsoventral height maximum	24
Ulnare distal dorsoventral height minimum	20
Ulnare maximum proximodistal length	36
Ulnare maximum anteroposterior width	36
Radiale proximal dorsoventral height maximum	29
Radiale distal dorsoventral height minimum	27
Radiale maximum proximodistal length	36
Radiale maximum anteroposterior width	38
Distal carpal 4 proximal dorsoventral height maximum	22
Distal carpal 4 distal dorsoventral height minimum	18
Distal carpal 4 maximum proximodistal length	34
Distal carpal 4 maximum anteroposterior width	38
Selected measurements from the scapula
Left scapula
Maximum proximodistal length	215
Maximum dorsoventral height, proximal blade	NA	acromion process distorted
Minimum dorsoventral height, middle of blade	54
Maximum dorsoventral height, distal blade	59
Maximum mediolateral width, distal end	21
Length of coracoid facet	57
Length of glenoid facet	37
Right scapula
Maximum proximodistal length	210
Maximum dorsoventral height, proximal blade	125
Minimum dorsoventral height, middle of blade	51
Maximum dorsoventral height, distal blade	54
Maximum mediolateral width, distal end	22
Length of coracoid facet	NA
Length of glenoid facet	33
Selected measurements from the coracoids
Left coracoid - almost complete
Maximum mediolateral width	220
Maximum anteroposterior length	260
Length of intercoracoid facet	NA
Maximum height of intercoracoid facet	NA
Length of glenoid facet	NA
Length of scapular facet	77
Max height of glenoid facet side	58
Right coracoid
Maximum mediolateral width	220
Maximum anteroposterior length	260
Length of intercoracoid facet	NA
Maximum height of intercoracoid facet	NA
Length of glenoid facet	92
Length of scapular facet	69
Max height of glenoid facet side	55
Clavicles
Maximum width	NA
Maximum length	NA
Approximate mediolateral width from distal tip to distal tip	660	estimate
Length of scapula facet left clavicle	52
Length of scapula facet right clavicle	48
Interclavicle
Maximum mediolateral width	78	estimate
Approximate anteroposterior length of interclavicle	260	estimate

## Sheet: Vertebral column
PMO 222.669 Vertebrae measurements taken with caliper (in mm)
		H	W	L
Vertebra number	Name	Max dorsoventral height	Max mediolateral width excl facets	Anteroposterior length	Comment	H/L	H/W	W/L
1 and 2	Atlasaxis	74	76	51		1.45098	0.973684	1.4902
3		NA	NA	NA
4		NA	NA	NA
5		NA	NA	NA
6	R	NA	NA	NA
7	S	NA	NA	32
8	T	58	NA	29	H is uncertain	2
9	U	72	NA	25		2.88
10	V	NA	NA	30
11	W	65	NA	31		2.09677
12	X	72	NA	32		2.25
13		NA	NA	NA
14	A	94	NA	NA
15	B	NA	NA	46
16	C	90	NA	42		2.14286
17	D	82	NA	39		2.10256
18	E	NA	NA	39
19	F	NA	NA	33
20	G	NA	NA	47
21	H	NA	NA	40
22	I	NA	NA	37
23	J	85	NA	42		2.02381
24	K	83	NA	44		1.88636
25	L	87	NA	42		2.07143
26	M	81	NA	41		1.97561
27	N	84	NA	44		1.90909
28	O	92	NA	44		2.09091
29	P	NA	NA	42
30	Q	NA	86	NA
