# Supplementary material for: A new specimen of Palvennia hoybergeti: implications for cranial and pectoral girdle anatomy in ophthalmosaurid ichthyosaurs
Source: PeerJ. 2018 Oct 12;6:e5776. doi: 10.7717/peerj.5776 (PMC6187996; doi:10.7717/peerj.5776)
Supplement: Supplemental Information 2 [file peerj-06-5776-s002.xlsx]

## Sheet: Forefin and pectoral girdle
PMO 230.097	Measurements in mm
Selected measurements from the left humerus
Maximum proximodistal length	104
Minimum anteroposterior width, midshaft	45
Maximum anteroposterior width, proximal end	70
Maximum dorsoventral height, proximal end	36
Maximum anteroposterior width, distal end	63
Length of radial facet anteroposteriorly	25
Length of ulnar facet anteroposteriorly	33
Length of preax. element facet anteroposteriorly	11
Maximum dorsoventral width of radial facet	24
Maximum dorsoventral width of ulnar facet	26
Maximum dorsoventral width of facet for preax. element	10
Zeugopodium elements
Radius proximal dorsoventral height maximum	23
Radius distal dorsoventral height minimum	15
Radius maximum proximodistal length	20
Radius maximum anteroposterior width	25
Ulna proximal dorsoventral height maximum	26
Ulna distal dorsoventral height minimum	14
Ulna maximum proximodistal length	30
Ulna maximum anteroposterior width	36
Intermedium proximal dorsoventral height maximum	14
Intermedium distal dorsoventral height minimum	12
Intermedium maximum proximodistal length	18
Intermedium maximum anteroposterior width	20
Selected measurements from the coracoids
Left coracoid
Maximum mediolateral width	110
Maximum anteroposterior length	150
Length of intercoracoid facet	NA
Maximum height of intercoracoid facet	NA
Length of glenoid facet	47
Length of scapular facet	41
Max height of glenoid facet	19
Max height of scapular facet	23

## Sheet: Vertebral column
PMO 230.097 Vertebrae measurements taken with caliper (in mm), sorted in suggested anterior- posterior order
Vertebra number	Max width excl facets	Max height	Ant-post length midway	H/L	H/W	Facet	Horizontal ridge
PMO 222.658/11	42	40	19	2.10526	0.952381	circular
PMO 222.658/1	49	47	17	2.76471	0.959184	circular
PMO 222.658/8	53	50	19	2.63158	0.943396	circular
PMO 222.658/9	51	52	20	2.6	1.01961	circular
PMO 222.658/23	53	53	19	2.78947	1	circular
PMO 222.658/24	54	53	19	2.78947	0.981481	circular
PMO 222.658/12	55	56	19	2.94737	1.01818	circular
PMO 222.658/3	56	57	21	2.71429	1.01786	circular
PMO 222.658/2	58	57	20	2.85	0.982759	circular
PMO 222.658/10	57	58	21	2.7619	1.01754	elongated	yes
PMO 222.658/14	55	58	21	2.7619	1.05455	elongated	yes
PMO 222.658/5	55	59	20	2.95	1.07273	elongated
PMO 222.658/4	NA	59	21	2.80952	NA	elongated
PMO 222.658/15	57	59	21	2.80952	1.03509	elongated	yes
PMO 222.658/13	58	59	21	2.80952	1.01724	elongated	yes
PMO 222.658/6	59	59	23	2.56522	1	elongated	yes
PMO 222.658/7	60	60	22	2.72727	1	elongated	yes
