# Supplementary material for: A new specimen of Palvennia hoybergeti: implications for cranial and pectoral girdle anatomy in ophthalmosaurid ichthyosaurs
Source: PeerJ. 2018 Oct 12;6:e5776. doi: 10.7717/peerj.5776 (PMC6187996; doi:10.7717/peerj.5776)
Supplement: Supplemental Information 3 [file peerj-06-5776-s003.xlsx]

## Sheet: Sheet1
PMO 224.250	Measurements in mm
Selected measurements from the right humerus
Maximum proximodistal length	195
Minimum anteroposterior width, midshaft	97
Maximum anteroposterior width, proximal end	142
Maximum dorsoventral height, proximal end	89
Maximum anteroposterior width, distal end	149
Length of radial facet anteroposteriorly	57
Length of ulnar facet anteroposteriorly	49
Length of preax. element facet anteroposteriorly	35
Maximum dorsoventral width of radial facet	52
Maximum dorsoventral width of ulnar facet	47
Maximum dorsoventral width of facet for preax. element	44
Zeugopodium elements
Radius proximal dorsoventral height maximum	51
Radius distal dorsoventral height minimum	33
Radius maximum proximodistal length	52
Radius maximum anteroposterior width	68
Ulna proximal dorsoventral height maximum	43
Ulna distal dorsoventral height minimum	14
Ulna maximum proximodistal length	57
Ulna maximum anteroposterior width	57
?Intermedium proximal dorsoventral height maximum	25
?Intermedium distal dorsoventral height minimum	25
?Intermedium maximum proximodistal length	44
?Intermedium maximum anteroposterior width	42
Preaxial acc. element proximal dorsoventral height maximum	43
Preaxial acc. element distal dorsoventral height minimum	20
Preaxial acc. element maximum proximodistal length	49
Preaxial acc. element maximum anteroposterior width	51
Selected measurements from the left humerus
Maximum proximodistal length	195
Minimum anteroposterior width, midshaft	91
Maximum anteroposterior width, proximal end	136
Maximum dorsoventral height, proximal end	87
Maximum anteroposterior width, distal end	144
Length of radial facet anteroposteriorly	53
Length of ulnar facet anteroposteriorly	47
Length of preax. element facet anteroposteriorly	35
Maximum dorsoventral width of radial facet	50
Maximum dorsoventral width of ulnar facet	40
Maximum dorsoventral width of facet for preax. element	42
Zeugopodium elements
Radius proximal dorsoventral height maximum	52
Radius distal dorsoventral height minimum	36
Radius maximum proximodistal length	44
Radius maximum anteroposterior width	55
Ulna proximal dorsoventral height maximum	32	somewhat deformed
Ulna distal dorsoventral height minimum	15
Ulna maximum proximodistal length	54
Ulna maximum anteroposterior width	57
Large unknown element proximal dorsoventral height maximum	37
Large unknown element distal dorsoventral height minimum	21
Large unknown element maximum proximodistal length	46
Large unknown element maximum anteroposterior width	67
Selected measurements from the scapula
Left scapula
Maximum proximodistal length	NA
Maximum dorsoventral height, proximal blade	NA
Minimum dorsoventral height, middle of blade	NA
Maximum dorsoventral height, distal blade	NA
Maximum mediolateral width, distal end	NA
Length of coracoid facet	NA
Length of glenoid facet	38
Right scapula
Maximum proximodistal length	NA
Maximum dorsoventral height, proximal blade	175
Minimum dorsoventral height, middle of blade	NA
Maximum dorsoventral height, distal blade	NA
Maximum mediolateral width, distal end	NA
Length of coracoid facet	35
Length of glenoid facet	81
Selected measurements from the coracoids
Left coracoid
Maximum mediolateral width	240
Maximum anteroposterior length	NA
Length of intercoracoid facet	165
Maximum height of intercoracoid facet	NA
Length of glenoid facet	130
Length of scapular facet	NA
Max height of glenoid facet	70
Right coracoid
Maximum mediolateral width	240
Maximum anteroposterior length	270
Length of intercoracoid facet	165
Maximum height of intercoracoid facet	NA
Length of glenoid facet	130
Length of scapular facet	54
Max height of glenoid facet	70
Clavicles
Maximum width	NA
Maximum length	NA
Length of scapula facet	NA
