# Supplementary material for: A new specimen of Palvennia hoybergeti: implications for cranial and pectoral girdle anatomy in ophthalmosaurid ichthyosaurs
Source: PeerJ. 2018 Oct 12;6:e5776. doi: 10.7717/peerj.5776 (PMC6187996; doi:10.7717/peerj.5776)
Supplement: Supplemental Information 4 [file peerj-06-5776-s004.xlsx]

## Sheet: 2D landmarks coracoids
2D landmarks used in the PCA
	1x	1y	2x	2y	3x	3y	4x	4y	5x	5y	6x	6y
PMO 222.669	131.13	27.31	82.33	25.61	95.99	85.94	157.69	90.38	163.83	57.47	147.32	39.9
PMO 224.250	61.91	36.3	91.02	37.68	102.02	80.64	46.57	96.73	35.88	62.65	48.47	53.45
PMO 222.667	71.68	14.96	135.61	19.76	136.6	74.51	38.24	86.78	37.11	41.91	45.01	30.06
PMO 214.578	72.74	70.2	90.45	66.82	104.92	88.76	72.11	106.96	64.91	88.19	67.31	81.28
PMO 222.654	4.11	13.72	13.46	8.23	22.05	21	6.91	30.43	2.59	24.64	3.15	19.2
OUMNH J48008	58.7	12.14	92.43	15.24	95.96	54.89	33.3	66.18	28.36	32.6	38.52	23.14
CAMSM J65813	32.91	9.21	46.88	14.71	55.77	38.84	6.24	48.37	7.94	21.27	14.08	18.94
CAMSM J65583	25.96	12.63	47.91	23.5	46.71	50.73	1.98	46.5	2.68	26.04	10.09	22.3
CAMSM J29807	31.61	12.84	54.96	19.26	54.68	49.11	7.34	52.07	8.89	24.48	20.46	16.93
CAMSM J29809	31.27	2.65	49.21	7.3	50.32	36.62	14.92	36.14	13.07	16.09	22.97	10
CAMSM J66275	24.91	19.97	54.61	26.46	50.87	56.73	6.99	54.75	4.16	35.63	13.41	28.93
LEICT 100 1949 2	88.16	5.93	125.41	13.65	138.75	69.11	42.02	85.09	42.97	32.07	59.27	18.31
LEICT 100 1949 18	46.46	7.41	77.68	15.66	79.06	69.32	11.64	69.53	9.53	26.99	22.44	20.96
LEICT 100 1949 20	58.63	38.31	89.11	46.36	109.64	105.41	14.39	121.92	13.76	77.47	24.77	63.71
LEIUG 90986/913	62.07	6.88	86.1	12.7	83.71	39.37	46.57	41.43	47.63	19.26	54.82	13.07
NHMUK R2137	49.39	15.38	94.83	31.47	90.73	79.02	10.87	91.02	3.1	46.43	20.04	38.24
NHMUK R3013	16.05	5.51	20.78	7.26	21.34	20.62	5.05	19.23	5.84	11	9.63	9.75
BSPGHM S.q.	29.55	14.92	36.58	16.13	37.27	27.72	25.85	27.56	24.42	20.21	27.17	17.77
SMNS 50165	63.92	31.27	73.92	40.85	67.52	53.76	46.25	44.87	52.81	39.91	57.79	32.65
SMNS 51142	5.03	22.97	20.16	20.96	28.05	33.97	8.63	44.45	1.06	34.98	3.92	29.1
SMNS 55074	24.62	26.12	27.35	27.61	27.32	32.46	20.9	31.33	21.21	26.99	23.06	26.34
SMNS 57532	17.78	49.94	31.96	56.41	32.28	76.15	7.99	69.22	8.2	56.09	14.29	52.07
SMNS 81961	18.79	27.2	26.3	33.18	21.43	43.23	8.36	36.99	8.57	29.69	12.44	28.73
IRSNB R269	4.83	4.69	8.67	4.81	9.09	11.7	2.83	12.11	1.02	8.11	3.39	5.88
UPM EP-II-20 (572)	32.58	24.55	58.6	33.55	59.45	70.27	2.86	73.66	9.2	42.55	14.49	36.72
UPM EP-II-8 (1076)	38.95	13.55	55.95	16.58	52.85	45.72	28.86	51.15	20.74	30.48	31.54	22.86
SNHM 1284-R	10.33	0.86	14.05	3.11	12.85	9.02	2.41	7.09	3.33	1.98	5.05	1.61
CMN 40608	6.38	0.93	10.35	3.58	10.34	7.24	3.21	7.13	3.16	3.84	4.03	2.73
SGS	33.96	16.51	62.3	18.73	66.22	64.14	16.71	60.64	14.07	32.81	24.75	23.5
PMO 222.658	63.29	54.61	94.72	40.11	89.22	118.32	22.86	117.69	18.31	79.48	35.24	64.77
Abbrev.	Museum number	Taxon
Ac	CMN 40608	Arthropterygius chrisorum
Ad	SNHM 1284-R	Acamptonectes densus
H	SGS	Platyperygius hercynicus
Jl	PMO 222.654	Janusaurus lundi
Kn	PMO 222.655	Keilhauia nui
Oi1	CAMSM J65583	Ophthalmosaurus icenicus
Oi2	NHMUK R3013	Ophthalmosaurus icenicus
Oi3	LEICT 100 1949 20	Ophthalmosaurus icenicus
Oi4	NHMUK R2137	Ophthalmosaurus icenicus
Oi5	OUMNH J48008	Ophthalmosaurus icenicus
Oi6	CAMSM J66275	Ophthalmosaurus icenicus
Oi7	LEICT 100 1949 18	Ophthalmosaurus icenicus
Oi8	CAMSM J29809	Ophthalmosaurus icenicus
Oi9	CAMSM J65813	Ophthalmosaurus icenicus
Oi10	LEICT 100 1949 2	Ophthalmosaurus icenicus
Oi11	CAMSM J29807	Ophthalmosaurus icenicus
Oi12	LEIUG 90986/913	Ophthalmosaurus sp.
P	UPM EP-II-8 (1076)	Paraophthalmosaurus kabanovi
Ph	PMO 222.669	Palvennia hoybergeti
S1	SMNS 81961	Stenopterygius quadriscissus
S2	SMNS 55074	Stenopterygius sp.
S3	SMNS 51142	Stenopterygius quadriscissus
S4	BSPGHM S.q.	Stenopterygius quadriscissus
S5	SMNS 57532	Stenopterygius uniter
S6	SMNS 50165	Stenopterygius quadriscissus
Si	IRSNB R269	Sveltonectes insolitus
SML1	PMO 224.250	Ophthalmosauridae indet., Slottsmøya Member Lagerstätte
SML2	PMO 222.667	Ophthalmosauridae indet., Slottsmøya Member Lagerstätte
SML3	PMO 222.658	Ophthalmosauridae indet., Slottsmøya Member Lagerstätte
U1	UPM EP-II-20 (572)	Undorosaurus gorodischensis
U2	PMO 214.578	Cryopterygius kristiansenae

## Sheet: MANOVA test of groups
MANOVA test of separation of Ophthalmosaurus vs. Stenopterygius
	1x	1y	2x	2y	3x	3y	5x	5y	6x	6y	7x	7y
OUMNH J48008	58.7	12.14	92.43	15.24	95.96	54.89	33.3	66.18	28.36	32.6	38.52	23.14
CAMSM J65813	32.91	9.21	46.88	14.71	55.77	38.84	6.24	48.37	7.94	21.27	14.08	18.94
CAMSM J65583	25.96	12.63	47.91	23.5	46.71	50.73	1.98	46.5	2.68	26.04	10.09	22.3
CAMSM J29807	31.61	12.84	54.96	19.26	54.68	49.11	7.34	52.07	8.89	24.48	20.46	16.93
CAMSM J29809	31.27	2.65	49.21	7.3	50.32	36.62	14.92	36.14	13.07	16.09	22.97	10
CAMSM J66275	24.91	19.97	54.61	26.46	50.87	56.73	6.99	54.75	4.16	35.63	13.41	28.93
LEICT 100 1949 2	88.16	5.93	125.41	13.65	138.75	69.11	42.02	85.09	42.97	32.07	59.27	18.31
LEICT 100 1949 18	46.46	7.41	77.68	15.66	79.06	69.32	11.64	69.53	9.53	26.99	22.44	20.96
LEICT 100 1949 20	58.63	38.31	89.11	46.36	109.64	105.41	14.39	121.92	13.76	77.47	24.77	63.71
LEIUG 90986/913	62.07	6.88	86.1	12.7	83.71	39.37	46.57	41.43	47.63	19.26	54.82	13.07
NHMUK R2137	49.39	15.38	94.83	31.47	90.73	79.02	10.87	91.02	3.1	46.43	20.04	38.24
NHMUK R3013	16.05	5.51	20.78	7.26	21.34	20.62	5.05	19.23	5.84	11	9.63	9.75
BSPGHM S.q.	29.55	14.92	36.58	16.13	37.27	27.72	25.85	27.56	24.42	20.21	27.17	17.77
SMNS 50165	63.92	31.27	73.92	40.85	67.52	53.76	46.25	44.87	52.81	39.91	57.79	32.65
SMNS 51142	5.03	22.97	20.16	20.96	28.05	33.97	8.63	44.45	1.06	34.98	3.92	29.1
SMNS 55074	24.62	26.12	27.35	27.61	27.32	32.46	20.9	31.33	21.21	26.99	23.06	26.34
SMNS 57532	17.78	49.94	31.96	56.41	32.28	76.15	7.99	69.22	8.2	56.09	14.29	52.07
SMNS 81961	18.79	27.2	26.3	33.18	21.43	43.23	8.36	36.99	8.57	29.69	12.44	28.73
4 contraints. New procrustes fitting from the landmarks.
Abbrev.	Museum number	Taxon
Oi1	CAMSM J65583	Ophthalmosaurus icenicus
Oi2	NHMUK R3013	Ophthalmosaurus icenicus
Oi3	LEICT 100 1949 20	Ophthalmosaurus icenicus
Oi4	NHMUK R2137	Ophthalmosaurus icenicus
Oi5	OUMNH J48008	Ophthalmosaurus icenicus
Oi6	CAMSM J66275	Ophthalmosaurus icenicus
Oi7	LEICT 100 1949 18	Ophthalmosaurus icenicus
Oi8	CAMSM J29809	Ophthalmosaurus icenicus
Oi9	CAMSM J65813	Ophthalmosaurus icenicus
Oi10	LEICT 100 1949 2	Ophthalmosaurus icenicus
Oi11	CAMSM J29807	Ophthalmosaurus icenicus
Oi12	LEIUG 90986/913	Ophthalmosaurus sp.
S1	SMNS 81961	Stenopterygius quadriscissus
S2	SMNS 55074	Stenopterygius sp.
S3	SMNS 51142	Stenopterygius quadriscissus
S4	BSPGHM S.q.	Stenopterygius quadriscissus
S5	SMNS 57532	Stenopterygius uniter
S6	SMNS 50165	Stenopterygius quadriscissus
MANOVA results
	O.icenicus	Stenopterygius
O.icenicus		0.00011133
Stenopterygius	0.00011133

## Sheet: Principal component score value
Principal component scores
PC1	35
PC2	22
PC3	16.5
PC4	9.8
PC5	6.9
PC6	5.9
PC7	2.3
PC8	1.2
PC 9-12	each pc <1,0
